# Supplementary material
Source: PubMed Central journal article supplement (PMC3609054)
Supplement: prio-7-76-s01.pdf [file prio-7-76-s01.pdf]

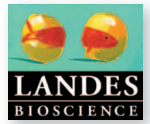

## **Supplemental Material to:**

**Marta Giacomello, Juan C. Oliveros, Jose R. Naranjo and  
Ernesto Carafoli**

**Neuronal CA<sup>2+</sup> dyshomeostasis in Huntington disease**

**Prion 2013; 7(1)**

**<http://dx.doi.org/10.4161/pri.23581>**

**<http://www.landesbioscience.com/journals/prion/article/23581/>**

-3.0 0.0 3.0

O7-3NP vs Q7 (GSE3583)  
 Q111 vs Q7 (GSE3583)  
 YAC128-12m vs WT-12m (GSE18551)  
 YAC128-24m vs WT-24m (GSE18551)  
 HD vs N (GSE1751)  
 P vs N (GSE1751)

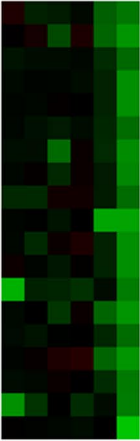

Tgfb1 | transforming growth factor, beta 1  
 Xab2 | XPA binding protein 2  
 Slc34a2 | solute carrier family 34 (sodium phosphate), member 2  
 Cdk5r1 | cyclin-dependent kinase 5, regulatory subunit 1 (p35)  
 Cdk5r1 | cyclin-dependent kinase 5, regulatory subunit 1 (p35)  
 Gabrg3 | gamma-aminobutyric acid (GABA) A receptor, subunit gamma 3  
 Kcnd2 | potassium voltage-gated channel, Shal-related family, member 2  
 Grik2 | glutamate receptor, ionotropic, kainate 2 (beta 2)  
 Slc25a12 | solute carrier family 25 (mitochondrial carrier, Aralar), member 12  
 Dchs1 | dachsous 1 (Drosophila)  
 Cdk5r1 | cyclin-dependent kinase 5, regulatory subunit 1 (p35)  
 Cdk5r1 | cyclin-dependent kinase 5, regulatory subunit 1 (p35)  
 D0H4S114 | DNA segment, human D4S114  
 Xab2 | XPA binding protein 2  
 Gabrg3 | gamma-aminobutyric acid (GABA) A receptor, subunit gamma 3  
 Xab2 | XPA binding protein 2  
 Casr | calcium-sensing receptor  
 D0H4S114 | DNA segment, human D4S114  
 Gpr4 | G protein-coupled receptor 4

Q7-3NP vs Q7 (GSE3583)  
 Q111 vs Q7 (GSE3583)  
 YAC128-12m vs WT-12m (GSE18551)  
 YAC128-24m vs WT-24m (GSE18551)  
 HD vs N (GSE1751)  
 P vs N (GSE1751)

Pdelc | phosphodiesterase 1C  
 Pgm5 | phosphoglucomutase 5  
 Pdelc | phosphodiesterase 1C  
 Sdk2 | sidekick homolog 2 (chicken)  
 Hrc | histidine rich calcium binding protein  
 Chrna4 | cholinergic receptor, nicotinic, alpha polypeptide 4  
 Fxyd1 | FXYD domain-containing ion transport regulator 1  
 Trpm8 | transient receptor potential cation channel, subfamily M, member 8  
 Drd3 | dopamine receptor D3  
 Ttyh1 | tweety homolog 1 (Drosophila)  
 Elane | elastase, neutrophil expressed  
 Wnt1 | wntless-related MMTV integration site 1  
 Best2 | bestrophin 2  
 Pdelc | phosphodiesterase 1C  
 Sdk2 | sidekick homolog 2 (chicken)  
 Plch2 | phospholipase C, eta 2  
 Grin1 | glutamate receptor, ionotropic, NMDA1 (zeta 1)  
 Plch2 | phospholipase C, eta 2  
 Pdelc | phosphodiesterase 1C  
 Cacnalf | calcium channel, voltage-dependent, alpha 1F subunit  
 Sh2b2 | SH2B adaptor protein 2  
 Pax4 | paired box gene 4  
 Olfr78 | olfactory receptor 78  
 Gpr17 | G protein-coupled receptor 17  
 Kcnb1 /// Pacsin2 | potassium voltage gated channel, Shab-related subfamily, member 1  
 Cdhr1 | cadherin-related family member 1  
 Olfr78 | olfactory receptor 78  
 Olfr78 | olfactory receptor 78  
 Cgref1 | cell growth regulator with EF hand domain 1  
 Myh4 | myosin, heavy polypeptide 4, skeletal muscle  
 Pmch | pro-melanin-concentrating hormone  
 Cherp | calcium homeostasis endoplasmic reticulum protein  
 Olfr78 | olfactory receptor 78  
 Sstr5 | somatostatin receptor 5  
 Cxcr3 | chemokine (C-X-C motif) receptor 3  
 Rem1 | rad and gem related GTP binding protein 1  
 Rcvrn | recoverin  
 Cgref1 | cell growth regulator with EF hand domain 1  
 Cyp27b1 | cytochrome P450, family 27, subfamily b, polypeptide 1  
 Scn9a | sodium channel, voltage-gated, type IX, alpha  
 Scn9a | sodium channel, voltage-gated, type IX, alpha  
 Scn9a | sodium channel, voltage-gated, type IX, alpha  
 Rem1 | rad and gem related GTP binding protein 1  
 Scgn | secretagogin, EF-hand calcium binding protein  
 Pou6f1 | POU domain, class 6, transcription factor 1  
 Scn9a | sodium channel, voltage-gated, type IX, alpha  
 Camk1 | calcium/calmodulin-dependent protein kinase I  
 Pou6f1 | POU domain, class 6, transcription factor 1  
 Scn9a | sodium channel, voltage-gated, type IX, alpha  
 Ldlr | low density lipoprotein receptor  
 Plcg1 | phospholipase C, gamma 1  
 Cav3 | caveolin 3  
 Ryr2 | ryanodine receptor 2, cardiac  
 Edil3 | EGF-like repeats and discoidin I-like domains 3  
 Gabrg3 | gamma-aminobutyric acid (GABA) A receptor, subunit gamma 3

-3.0 0.0 3.0

Q7-3NP vs Q7 (GSE3583)  
 Q111 vs Q7 (GSE3583)  
 YAC128-12m vs WT-12m (GSE18551)  
 YAC128-24m vs WT-24m (GSE18551)  
 HD vs N (GSE1751)  
 P vs N (GSE1751)

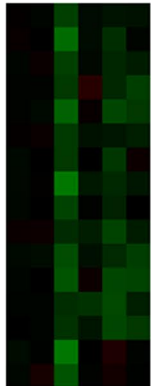

|         |  |                                                                      |
|---------|--|----------------------------------------------------------------------|
| Camk1d  |  | Calcium/calmodulin-dependent protein kinase ID                       |
| Magi2   |  | membrane associated guanylate kinase, WW and PDZ domain containing 2 |
| Gnao1   |  | guanine nucleotide binding protein, alpha 0                          |
| Actl6b  |  | actin-like 6B                                                        |
| Pdelc   |  | phosphodiesterase 1C                                                 |
| Cbaral  |  | calcium binding atopy-related autoantigen 1                          |
| Ccl19   |  | chemokine (C-C motif) ligand 19                                      |
| Nup214  |  | nucleoporin 214                                                      |
| Cacna1b |  | calcium channel, voltage-dependent, N type, alpha 1B subunit         |
| Ehd1    |  | EH-domain containing 1                                               |
| Kcnh1   |  | potassium voltage-gated channel, subfamily H (eag-related), member 1 |
| Dgkb    |  | diacylglycerol kinase, beta                                          |
| Ttyh1   |  | tweety homolog 1 (Drosophila)                                        |
| Pdelc   |  | phosphodiesterase 1C                                                 |
| Nell2   |  | NEL-like 2 (chicken)                                                 |
| Rhoa    |  | Ras homolog gene family, member A                                    |
